# Supplementary material for: Synthesis and properties of hetero-halogenated TTFsElectronic supplementary information (ESI) available: experimental details. See http://www.rsc.org/suppdata/ob/b3/b310822h/
Source: Royal Society of Chemistry journal article supplement (doi:10.1039/b310822h), 2003-01-01
Supplement: b310822h.doc [file b310822h.doc]

Electronic Supplementary Information (ESI) service

**Synthesis and Properties Hetero-halogenated TTFs**

**Rie Suizu and Tatsuro Imakubo**

*Imakubo Initiative Research Unit, RIKEN, 2-1 Hirosawa, Wako, Saitama 351-0198, Japan.*

Fax: +81 48 467 8790; Tel: +81 48 467 8792; E-mail: imakubo@postman.riken.go.jp

**ClI-TTF**: orange crystals, m.p. 124 °C (decomp.); H (270 MHz, CDCl3) 6.35 (s, 4H); *m/z* (EI, 70 eV): 364 (M+ for C6H435ClIS4); Elemental analysis: Calc. for C6H4ClIS4: C, 19.76; H, 0.55. Found: C, 19.79; H, 0.53.

**ClIEDO**: red crystals, m.p. 111 °C (decomp.); H (270 MHz, CDCl3) 4.26 (s, 4H); *m/z* (EI, 70 eV): 422 (M+ for C8H435ClIO2S4); Elemental analysis: Calc. for C8H4ClIO2S4: C, 22.73; H, 0.95. Found: C, 22.99; H, 0.94.

**ClIET**: red crystals, m.p. 187 °C (decomp.); H (270 MHz, CDCl3) 3.30 (s, 4H); *m/z* (EI, 70 eV): 454 (M+ for C8H435ClIS6); Elemental analysis: Calc. for C8H4ClIS6: C, 21.12; H, 0.89. Found: C, 21.12; H, 0.78.

**ClIEDS**: orange crystals, m.p. 176 °C (decomp.); H (270 MHz, CDCl3) 3.35 (s, 4H); *m/z* (EI, 70 eV): 550 (M+ for C8H435ClIS480Se2); Elemental analysis: Calc. for C8H4ClIS4Se2: C, 17.51; H, 0.73. Found: C, 17.60; H, 0.58

**ClIETS**: purple crystals, m.p. 188 °C (decomp.); H (270 MHz, CDCl3) 3.31 (s, 4H); *m/z* (EI, 70 eV): 550 (M+ for C8H435ClIS480Se2); Elemental analysis: Calc. for C8H4ClIS4Se2: C, 17.51; H, 0.73. Found: C, 17.76; H, 0.57.

**ClIVT**: orange crystals, m.p. 175 °C (decomp.); H (270 MHz, CDCl3) 6.55 (s, 2H); *m/z* (EI, 70 eV): 452 (M+ for C8H235ClIS6); Elemental analysis: Calc. for C8H2ClIS6: C, 21.22; H, 0.45. Found: C, 21.17; H, 0.35.

**ClIMT**: red crystals, m.p. 138 °C (decomp.); H (270 MHz, CDCl3) 4.96 (s, 2H); *m/z* (EI, 70 eV): 440 (M+ for C7H235ClIS6); Elemental analysis: Calc. for C7H2ClIS6: C, 19.07; H, 0.46. Found: C, 19.08; H, 0.43.

**ClIMDS**: red crystals, m.p. 165 °C (decomp.); H (270 MHz, CDCl3) 4.95 (s, 2H); *m/z* (EI, 70 eV): 536 (M+ for C7H235ClIS480Se2); Elemental analysis: Calc. for C7H2ClIS4Se2: C, 15.73; H, 0.38. Found: C, 15.72; H, 0.31.

**ClIP**: orange wool, m.p. 245 °C (decomp.); H (270 MHz, CDCl3) 8.06 (s, 2H); *m/z* (EI, 70 eV): 416 (M+ for C8H235ClIS4N2); Elemental analysis: Calc. for C8H2ClIS4N2: C, 23.06; H, 0.48; N, 6.72. Found: C, 23.15; H, 0.39; N, 6.53.

**ClIPS**: red crystals, m.p. 221 °C (decomp.); H (270 MHz, CDCl3) 8.13 (s, 2H); *m/z* (EI, 70 eV): 512 (M+ for C8H235ClIS2Se2N2); Elemental analysis: Calc. for C8H4ClIS4Se2N2: C, 18.82; H, 0.39; N, 5.49. Found: C, 18.89; H, 0.32; N, 5.44.
